# Supplementary material
Source: PubMed Central journal article supplement (PMC1864965)
Supplement: 7601604s1.pdf [file 7601604s1.pdf]

**Figure S1.** Developmental stage of lethality of  $Pof^{D140}/Pof^{D140}; ci^{57g}/0$  offspring. Embryos (n=845) from the cross  $Pof^{D140}/Pof^{D140}; C(4)RM\ sv^{spa-pol}/0 \text{♀♀} \times Pof^{D140}/Pof^{D140}; ci^{57g}/ci^{57g} \text{♂♂}$  were followed through development and counted as embryos, first instar larvae, third instar larvae, pupae and adults. The percent survival is shown in red. As controls embryos (n=645) from the cross  $Pof^{D140}/Pof^{D140}; C(4)RM\ sv^{spa-pol}/0 \text{♀♀} \times ci^{57g}/ci^{57g} \text{♂♂}$  were followed through development and shown in blue. Considering the lethality in the control experiment to be normal for this experiment, the normalized survival of offspring from the cross  $Pof^{D140}/Pof^{D140}; C(4)RM\ sv^{spa-pol}/0 \text{♀♀} \times Pof^{D140}/Pof^{D140}; ci^{57g}/ci^{57g} \text{♂♂}$  is plotted in black. The results suggest that although the majority of the expected 50%  $Pof^{D140}/Pof^{D140}; ci^{57g}/0$  offspring die as embryos or early larvae a small proportion survive until pupal stages.

**Figure S2.** Statistical analysis of gene expression in *Pof* mutants and *HPI* RNAi compared to wildtype. (A) Microarray analysis showing the median level of mRNA from genes on the 4<sup>th</sup> chromosome in  $Pof^{D2}/Pof^{D2}$  mutant first instar larvae as a function of the median levels in wildtype in log<sub>2</sub> scale. Genes for which there were reduced amounts of mRNA (below dotted line) are marked with filled circles and genes for which there were increased amounts with open circles. (B) Mean change in gene expression for each chromosome arm,  $Pof^{D2}$  – wildtype expression (log<sub>2</sub> scale). Squares indicate the mean value and whiskers indicate 95% confidence interval. ANOVA tests for all chromosome arms were performed on log<sub>2</sub> differences between median wildtype and median mutant expression. (C, D and E) A significant ANOVA (p<0.05) was followed by Duncan's multiple range test to pair wise compare all chromosome arms. (C) Results from Duncan's multiple range test,  $Pof^{D2}$  – wildtype. Values in red are significant at p < 0.05. (D) Results from Duncan's multiple range

test, *Pof*<sup>D119</sup> – wildtype (see Figure 3A, B). (E) Results from Duncan's multiple range test, *HPI* RNAi – control (see Figure 3C, D). (F) Correlation plot of *Pof*<sup>D119</sup> and *HPI* RNAi expression change values (log<sub>2</sub> scale). Regression line is indicated in red.

**Figure S3.** POF binding of chromosome 4 from position 200kb to position 800kb at 10-kb resolution (according to annotation release 4). The Y-axis indicates enrichment plotted as percent of input. Enrichment using a MOCK antisera or no antisera was determined at all positions and never exceeded 0.1%.

**Figure S4.** POF binding to d4 (distal-4<sup>th</sup> chromosome) on translocated 4<sup>th</sup> chromosomes. (A) Examples of the four staining classes used in the analysis. The chromosomes were stained with POF (red) and MSL3 (green, to verify the cytology) and counterstained with DAPI (blue). (B) Summary of POF binding to different translocations at different conditions.

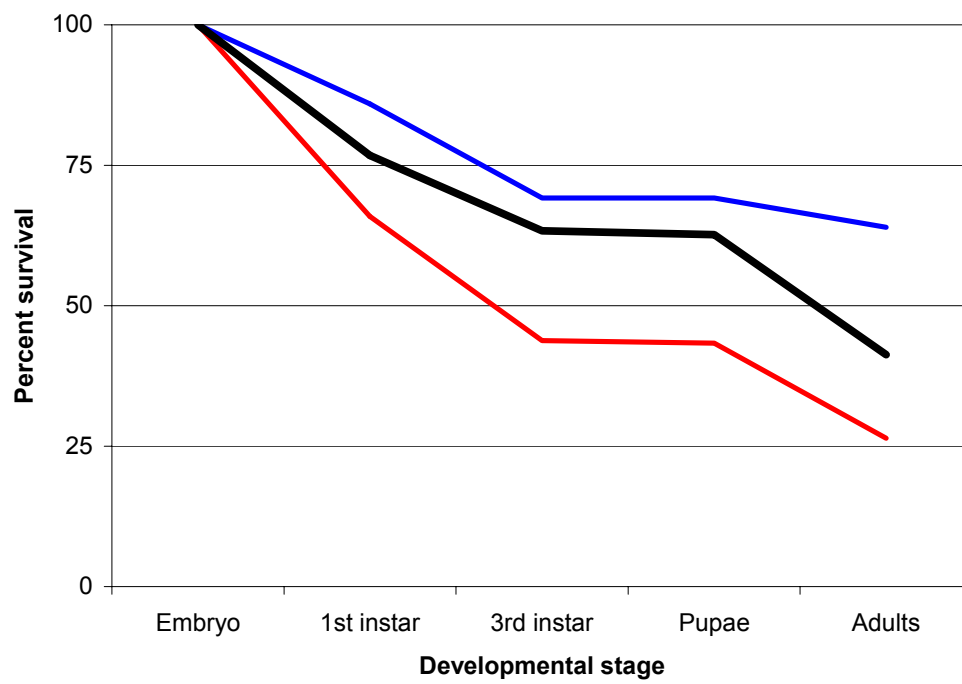

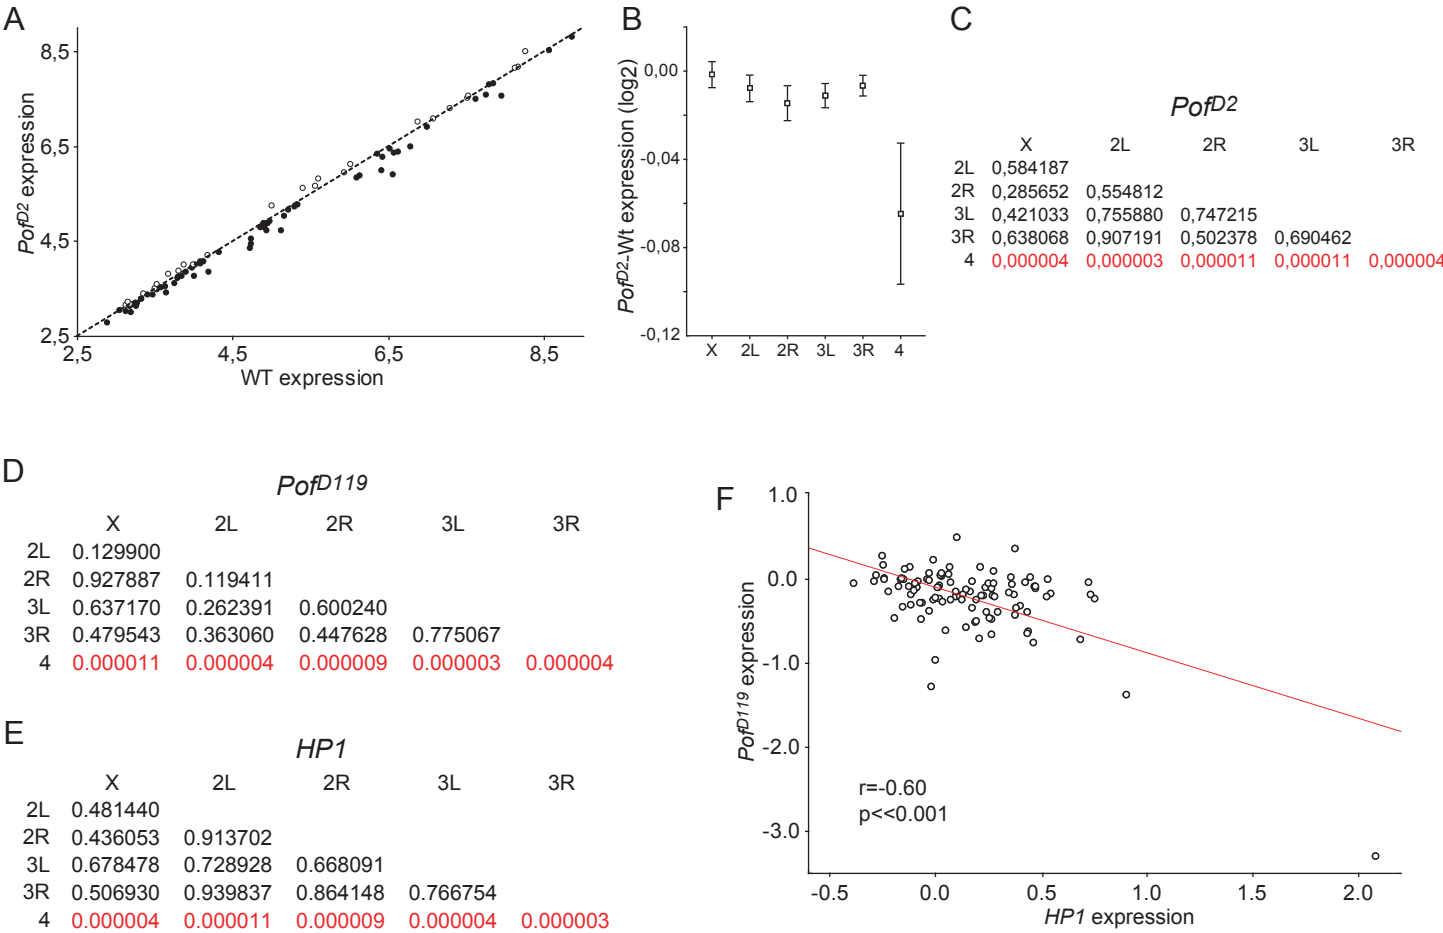

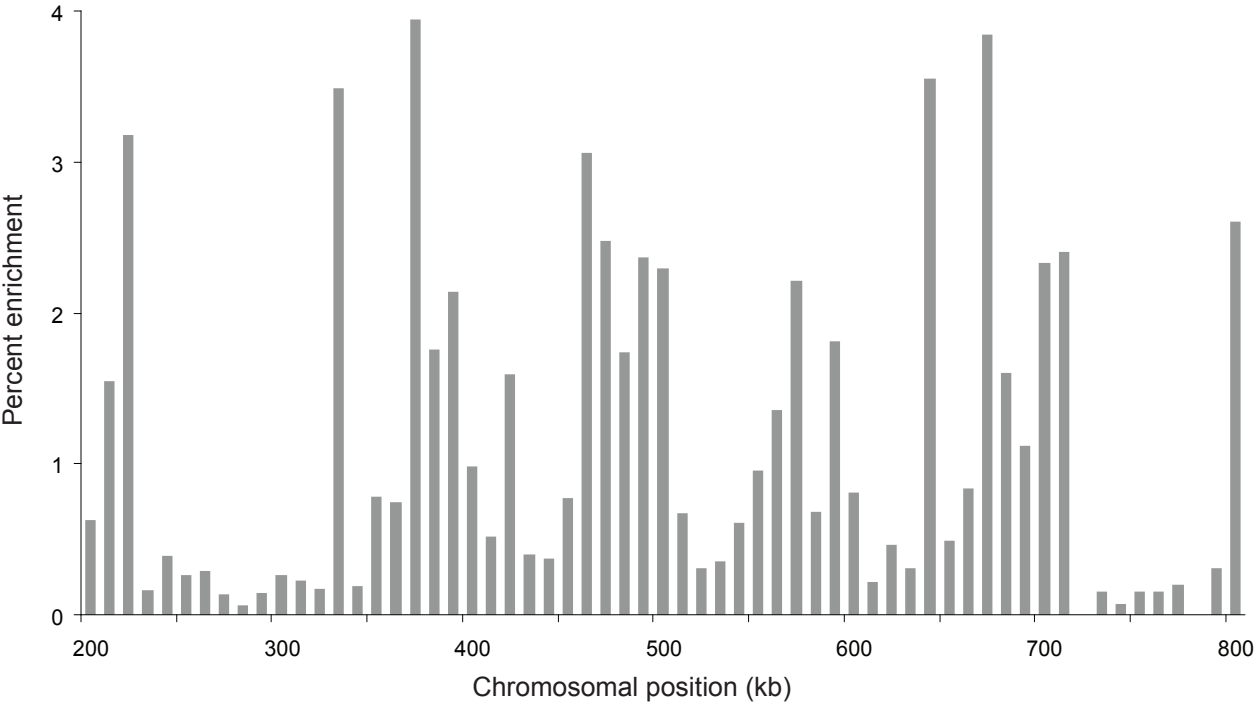

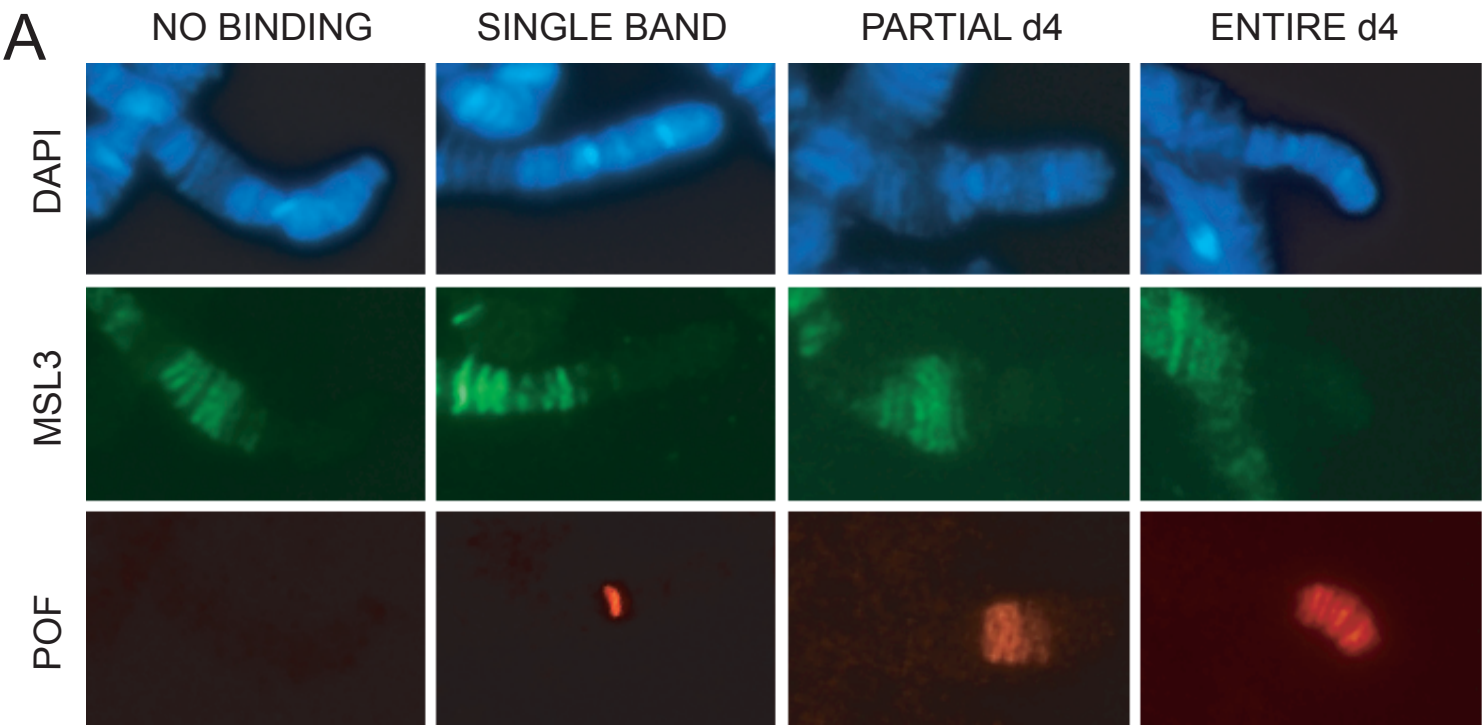

**B**

| Translocation                    | Breakpoints         | Y-<br>chr | Temp<br>(°C) | STAINING CLASSES |                |               |              |
|----------------------------------|---------------------|-----------|--------------|------------------|----------------|---------------|--------------|
|                                  |                     |           |              | NO<br>BINDING    | SINGLE<br>BAND | PARTIAL<br>d4 | ENTIRE<br>d4 |
| <i>T(1;4)w<sup>m258-18</sup></i> | 3C4-5;<br>h59-h61   | 0         | 18           | +/-              | +              | ++            | +            |
| <i>T(1;4)w<sup>m258-18</sup></i> | 3C4-5;<br>h59-h61   | Y         | 18           | +                | ++             | +             |              |
| <i>T(1;4)w<sup>m258-18</sup></i> | 3C4-5;<br>h59-h61   | 0         | 25           | +                | ++             | +             |              |
| <i>T(1;4)w<sup>m258-18</sup></i> | 3C4-5;<br>h59-h61   | Y         | 25           | ++               | +              |               |              |
| <i>T(1;4)w<sup>m5</sup></i>      | 3C2; 101F           | Y         | 18           | ++               | +              |               |              |
| <i>T(1;4)w<sup>m5</sup></i>      | 3C2; 101F           | Y         | 25           | +++              |                |               |              |
| <i>T(1;4)el5</i>                 | 13C; >101           | Y         | 18           | +++              |                |               |              |
| <i>T(1;4)B<sup>S</sup></i>       | 16A7-<br>B1;102F    | Y         | 18           | +++              |                |               |              |
| <i>T(1;4)w<sup>m258-21</sup></i> | 3E5-6;<br>101F      | Y         | 18           | +++              |                |               |              |
| <i>T(1;4)sc<sup>H</sup></i>      | 1B4;101F1-<br>102D1 | Y         | 18           | +++              |                |               |              |

+++; all nuclei show this staining class  
++; a majority of the nuclei show this staining class  
+; a fraction (>5%) of the nuclei show this staining class  
+/-; occasional nuclei show this staining class
