# Supplementary material
Source: PubMed Central journal article supplement (PMC1864965)
Supplement: 7601604s2.pdf [file 7601604s2.pdf]

## Chromatin immunoprecipitation of the 4th chromosome at 10 kb resolution

|     | Sense                           | Antisense                         |
|-----|---------------------------------|-----------------------------------|
| 200 | 5'-CCTCAAACCTATAATTCTGACCG-3'   | 5'-AGGCCTTAGCAAGACTTCTAAC-3'      |
| 210 | 5'-CCAACCCAAAGGAATGAAGAA-3'     | 5'-TACAGGCGGAGATGTAGGACG-3'       |
| 220 | 5'-GGCTGCCAATAGTACAAAC-3'       | 5'-ATTCTTCGCAGCAAATCTCAAA-3'      |
| 230 | 5'-GACTCAATGTTCCCTTGTGGT-3'     | 5'-CAATCCGATCAATCCGCTGTG-3'       |
| 240 | 5'-GCGACGATAATTCAAAACGG-3'      | 5'-CTGCGAAAGTCTGCTCCAGT-3'        |
| 250 | 5'-AACAACCTTGGTATTTGCGTCCG-3'   | 5'-GCAAAAATCTGTTAGACCCAAACCTTC-3' |
| 260 | 5'-AAAGATCACGAAATTAATGACG-3'    | 5'-AAACTAGAATGGCGGAGGGAAG-3'      |
| 270 | 5'-GTGTCGTAAAACCGCTTCTTAGT-3'   | 5'-ATTTACCTGGAAGAGTTCATAA-3'      |
| 280 | 5'-CAAAGTTGAAAATGCAACAGAAC-3'   | 5'-AAGCAAATGACGAAAAGGATAGA-3'     |
| 290 | 5'-GAGTCGGCATTCTAGTCTCAA-3'     | 5'-ACGGAAGCTACGTCTACCCTAT-3'      |
| 300 | 5'-TTCGTCCTATTAACCTCGTTCC-3'    | 5'-CCAGTATTTAATGAATCCTTTAGTT-3'   |
| 310 | 5'-TGTATGATTTATCGGTTCTTGGC-3'   | 5'-AGCTTATTCGTGGTGTGTTGAG-3'      |
| 320 | 5'-CCTTTGCCCTTGTCTTTGTC-3'      | 5'-TTGATCATGGCTTGGTCTCC-3'        |
| 330 | 5'-GGACGCAATAGAACGGGTATA-3'     | 5'-GTACAAGGGCCTCTGGGAAT-3'        |
| 340 | 5'-GATTCAAACGGAACAGACGC-3'      | 5'-CCAAGTCACGGTCGCCAT-3'          |
| 350 | 5'-CACCAGGTCTGTTATGGGAAAT-3'    | 5'-TGGGTTAATGTTAGTGCATCAAAA-3'    |
| 360 | 5'-CTGAGTAATGGGTAGAGCAAAATG-3'  | 5'-CATGGCCGGATCAACTTAGAC-3'       |
| 370 | 5'-GGTATTCGTTGAAAAGTAGGCTT-3'   | 5'-TAACCGTTACTCGGATTATGGA-3'      |
| 380 | 5'-ATCTTGTGCGGATGCTTTGTTT-3'    | 5'-CCTTTCACGGTGCGTAGTC-3'         |
| 390 | 5'-GCTGTAAGAAGTACTGCTCACAGAA-3' | 5'-CTTGCTAGTGCTAGAAGACGATTTT-3'   |
| 400 | 5'-GAAATAAGTGCGGGCTTACAGC-3'    | 5'-CAAAGACCATTAGGCGAGGAA-3'       |
| 410 | 5'-TTCGATTACCAGGTTCCCTT-3'      | 5'-GCACTCTACAACGCCATCC-3'         |
| 420 | 5'-CAACGGTGGTTTACGTTTGG-3'      | 5'-ACCTGTGGTGTTCGCTGAT-3'         |
| 430 | 5'-AAGTTCCCGACAGCCATTAC-3'      | 5'-CTGGTTGACAGGTTGCAGTCC-3'       |
| 440 | 5'-CACTGATGGTTTGGGGCTG-3'       | 5'-ACGGCATTATTGGGCTTTC-3'         |
| 450 | 5'-AAAACAGTCAAGGAACTTTACACA-3'  | 5'-TAGAGGCAAGGTAATCTTCAGC-3'      |
| 460 | 5'-CCTGTGACTCGCTGGATGTA-3'      | 5'-ATCCTATGGGCAACGAAACT-3'        |
| 470 | 5'-CAACATCCCGTCTATCTGTCC-3'     | 5'-TAGAACCTGTACGCTCAACCC-3'       |
| 480 | 5'-CTAGCCGAAAGCGTGGAAG-3'       | 5'-GCCGTGTTGCCTGTACCTT-3'         |
| 490 | 5'-GACATAGCCATGAGGGGATT-3'      | 5'-CGTCCTGCTGGTAGTGCTG-3'         |
| 500 | 5'-CCCCTGTGCCAGTGGTGTGA-3'      | 5'-TCTGTGGGTCGTTTGCCTTAT-3'       |
| 510 | 5'-CTACCCTCGTCACATACATCG-3'     | 5'-ACAAATCAAGAACGCCCAT-3'         |
| 520 | 5'-GATTTCTCCCATAACGGTC-3'       | 5'-CGGTGTCGGTGGATCCTAT-3'         |
| 530 | 5'-CTCCCGTGTATTGAGTTAGTGG-3'    | 5'-GTTTTCTTTCTGCGATACCCT-3'       |
| 540 | 5'-TATCATCTACTCCCTTCGACG-3'     | 5'-GCATGGCTTGGTTCATCAC-3'         |
| 550 | 5'-GACTCTTACTTCTGGTGGATCAGA-3'  | 5'-TGTTTTCAATAGGAGTTGGTGTCT-3'    |
| 560 | 5'-TGCTCAACTGATAGCCACCAC-3'     | 5'-TGTTTTCAAACCAACGGGAA-3'        |
| 570 | 5'-CCTGGACTTCGGATTATCTTTG-3'    | 5'-TGGGAAGCAGTCGCATTCT-3'         |
| 580 | 5'-TCGTGTTGAGGCACAAGAGTA-3'     | 5'-CAAATCGGACATTACGAGACC-3'       |
| 590 | 5'-CTAGTAGAGGAGGTAAGTCAAGCG-3'  | 5'-TCCAGACGAGGTCACATCACT-3'       |
| 600 | 5'-TAACCTCGTGCCTGTCTAAGCT-3'    | 5'-CCAAATTGTTGTGCCCTGAT-3'        |
| 610 | 5'-CGAGTTTCATAATGGCAGTTCTA-3'   | 5'-ACCTTCTTCTACGCCTTACTTG-3'      |
| 620 | 5'-CTATTGTTTGTGGGATGTGATA-3'    | 5'-GCTCTTCCAGCATTTCGTC-3'         |
| 630 | 5'-CTATGGATTCTTCCCGAACTAC-3'    | 5'-TTTGTGAAAGCCGTTATAGTAGC-3'     |
| 640 | 5'-CATTATTGACAACACGACCCTC-3'    | 5'-GCTCTAACCAAGGTCAGTGC-3'        |
| 650 | 5'-GGTCCGAAGCAGAACCCA-3'        | 5'-TCTTTGAAGCCTCCCCGTA-3'         |
| 660 | 5'-TATTCGTCGTCCTCACAAACC-3'     | 5'-ACTCCTCATGGGCATCTGAA-3'        |
| 670 | 5'-CCATTTCGTCATCAGTCGATCC-3'    | 5'-TGGTCATTGGCCATTGACTATC-3'      |
| 680 | 5'-TCGCCTGGATCACGACAG-3'        | 5'-TGTGAACGGGTCACAGCAC-3'         |
| 690 | 5'-GGTAGCGTTTCTACCCCAT-3'       | 5'-ATCTTGCCCTCCGCTTTTG-3'         |
| 700 | 5'-AGAAAGGGCTGAACAACGAAT-3'     | 5'-GTGTGCGGTCATGTCAAGGT-3'        |
| 710 | 5'-GGTTGACATTATGAGTTTATACCGA-3' | 5'-GAGTACCATCGCCAAGGATC-3'        |
| 730 | 5'-GTATCATGGGTGCAAGGGTGT-3'     | 5'-CGTCGGGACTTAGCATCTCA-3'        |

|                  |                                 |                               |
|------------------|---------------------------------|-------------------------------|
| 740              | 5'-TCCCCTCACCATCACATC-3'        | 5'-TTGCTCCCAAATTCGCAGA-3'     |
| 750              | 5'-CATTTCAAACCGTGTCTAAAC-3'     | 5'-GTTAGCATCGCTCGCACC-3'      |
| 760              | 5'-CGGTGAAGGACAGGTGAGAG-3'      | 5'-TGTGTTTCAAGCCAAAGGACTA-3'  |
| 770              | 5'-ATGGTCGGTTGATGTCTTG-3'       | 5'-TCTCCGTTGGTTAATGGGATA-3'   |
| 790              | 5'-CCTTGGCTGACTGGAGACC-3'       | 5'-TCGGCAGCAGGAACCTCT-3'      |
| 800              | 5'-GCTATAGGGACTGTTACCTTGACAA-3' | 5'-GCCGTGCAATCGTTCTC-3'       |
| Control 1 Chr X  | 5'-TACCCTCTCTTTTCGGGACTTG-3'    | 5'-TCCATCACTCTCTATCGGGCTG-3'  |
| Control 2 Chr X  | 5'-GGCCATCGAAAGGGTAAATTG-3'     | 5'-ACTGTCCGTAAGACAATTCAAC-3'  |
| Control 3 Chr 2L | 5'-TTTACCACGGCGAAATAGGC-3'      | 5'-GTGTCCTTGATGTCATTCTCCTA-3' |
| Control 4 Chr 2R | 5'-TTGTTCAACGAAATCGGCAGTA-3'    | 5'-TCACGGTTATGAGCAGTAGGGT-3'  |
| Control 5 Chr 3L | 5'-GCCTACAAGATAATGAAACG-3'      | 5'-GGTACAACCAACTGAAGACC-3'    |
| Control 6 Chr 3R | 5'-CCGATACGGCATCAAAGGAC-3'      | 5'-GCATCTGAGGTTGGTAGGGA-3'    |

### High resolution ChIP

#### CG31998

|     |                               |                              |
|-----|-------------------------------|------------------------------|
| 216 | 5'-CGATCTAGCCATTTCCGTCTG-3'   | 5'-CGCTGCGTCTATGTCTTTGG-3'   |
| 218 | 5'-GAAATCGTAGAAAGCCTTGGTC-3'  | 5'-AATAATGGAAAGCATAGGTCCG-3' |
| 220 | 5'-GGCTGCCAATAGTACAAAC-3'     | 5'-ATTCTTCGCAGCAAATCTCAA-3'  |
| 222 | 5'-AATTGCCCTCTGTCTTACG-3'     | 5'-GTCTTCTGGAAGAACACGCAC-3'  |
| 224 | 5'-CATTCTACTCATTCCACGCTACA-3' | 5'-ATCAAACAAAACCGTCCCTAAC-3' |
| 225 | 5'-TTTCACTTCCGGGGATCGTA-3'    | 5'-TTAAATGGGAGCCAGGGGTA-3'   |
| 226 | 5'-TATGACGACGCAAATGACGGA-3'   | 5'-TGAATGGGTGGGATTATGACA-3'  |
| 227 | 5'-GACCACGTTGTGCCAGGTAT-3'    | 5'-TGTCCGCTATCCAGTCCATC-3'   |

#### MED26

|     |                              |                                |
|-----|------------------------------|--------------------------------|
| 796 | 5'-TATTTACAACATGGCCCTGGTA-3' | 5'-CGGTCCCATTGCTGTAGATAGAA-3'  |
| 798 | 5'-CAGCGAGGAATTGGCGATAT-3'   | 5'-CTTTGCATGTTCCGTTGTGC-3'     |
| 800 | 5'-CAGCAGTCTTTATTCGTTTTCG-3' | 5'-CAGTCCCTATAGCAGTTCTAGCAG-3' |
| 804 | 5'-GTCTAAACAAACCAATGGCCC-3'  | 5'-ACGCTGGTACAAACACGGAATG-3'   |
| 806 | 5'-CGTGAGCTTGGTGTAGATGGTA-3' | 5'-TCGGATTCCGATGAGAATGAC-3'    |
| 808 | 5'-TCACATTTTACCACAGCGGC-3'   | 5'-CATGGGGTAGCTCAGTTCTTAGAC-3' |
| 810 | 5'-GATTCGCAATTCGACTTTTGTG-3' | 5'-GGTGGTAAGTGCAGAAATCCTTC-3'  |
| 812 | 5'-GGGAGAAATGGTCTTGGCATA-3'  | 5'-CCACTGTCGGAAATCTAGGC-3'     |

#### Zyx102EF

|      |                                |                                |
|------|--------------------------------|--------------------------------|
| 1074 | 5'-CCGCCTCGATCTCAAGAACTAT-3'   | 5'-CTGTCATCTCTTTTATTGCGGC-3'   |
| 1076 | 5'-TACTAAGCATAAGCTCCCGTGG-3'   | 5'-AAACTCGCAATGAGAAGGGTG-3'    |
| 1078 | 5'-GGAATAAAAGATTCGGTAAAAG-3'   | 5'-GGCAGATAGACTCGGCTAGTGT-3'   |
| 1079 | 5'-TAGGTGGTGGCGGTAACACTCAT-3'  | 5'-TTCTGCGAGTACATATTCAAACG-3'  |
| 1080 | 5'-CCCTCTAAAACGGTACAATAACGG-3' | 5'-GCATCAGTAAAGAGGAGATTGGAT-3' |
| 1082 | 5'-GAACACCACACCCAATCGTCTA-3'   | 5'-ATCGGTCATTCCCTATCCTT-3'     |
| 1084 | 5'-TTTTACGTCGCTCACTGTCACG-3'   | 5'-ACCATTCCCGTCTTTACCT-3'      |

|                  |                              |                              |
|------------------|------------------------------|------------------------------|
| <i>CaMKII</i>    | 5'-AAAGTCAGCGAGTTTCACTG-3'   | 5'-CAATCACTGCCACCAAATG-3'    |
| <i>CG11076</i>   | 5'GCACATCGTCTCTTTTTGTTCC--3' | 5'-GAAATTCTTGAAGCTACTGCC-3'  |
| <i>CG31992</i>   | 5'-GCCAACCATCCATTGATAGG-3'   | 5'-AAGGAAGATGTAGAGCGGG-3'    |
| <i>CG1732</i>    | 5'-GCATTTCTTGTCTATCCATCG-3'  | 5'-GTGAGTCCAATCCAATGAGCA-3'  |
| <i>Pur-Alpha</i> | 5'-GGGGCCTAGATCTCAAATCG-3'   | 5'-CCCTCCATCATTAGCTCCAAAC-3' |
| <i>CG2165</i>    | 5'-TCGACCCAGCATATCCAATC-3'   | 5'-TTTGCCGCAATCATCGTC-3'     |
| <i>Xbp1</i>      | 5'-AACCTGGGAGGAGAAAGTG-3'    | 5'-TCCTTGATCTCGTAGTCCATC-3'  |

CG4016

5'-TTGTTCAACGAAATCGGCAGTA-3'

5'-TCACGGTTATGAGCAGTAGGGT-3'

#### Real-time RT-PCR

*CaMKII*

5'-GGGAGCCATACTTACGACAATG-3'

5'-CATCGTCTTCAAGAGTAGTGC-3'

CG11076

5'-GACGCTAGAACAAAAAGAGGAC-3'

5'-CTCGATGTCCTTTCGTCTAAG-3'

CG31992

5'-GGAGATCAACTCTGACAGTACG-3'

5'-AATACTGCGTCCAGTTGACC-3'

CG1732

5'-CATTACCTGGCGCTTTAGAAGG-3'

5'-AAGTCCAAGCCCGTATGAG-3'

*Pur-alpha*

5'-TTTAGCGATTACTACGTCTCTC-3'

5'-ACGCGCATTTTCTTTAAGTCC-3'

CG2165

5'-GCGGCAGTTGACGAACAAGAAG-3'

5'-GCTTGGGACCCCTTTATTTGCG-3'

*actin*

5'-CAGCCAGCAGTCGTCTAATC-3'

5'-ACAACCAGAGCAGCAACTTC-3'

*Pof*

5'-CCACCATCTGCGACATAAACAG-3'

5'-CGACGAGTAATTTGGTACACTG-3'

CG33228

5'-ACACAAAATGTGTGCGGC-3'

5'-GGGGTCTTGAAGTAATCAACC-3'

CG4806

5'-AAAGACGATGCCAAGGACTCAC-3'

5'-GCTTGGCGGCCGTGCCGACA-3'

#### Characterization of CG33228

Race1

5'-TGGCATAGTGATAGGCGGCCACCGCAGC-3'

Race2

5'-TCCGCCATTTGCGGAGCACGCTGCTGG-3'

Race3

5'-CCACTGCCACGACCACTGTACTTGCTGC-3'
